# Supplementary material for: Enhancing 1,3-Propanediol Productivity in the Non-Model Chassis Clostridium beijerinckii through Genetic Manipulation
Source: MDPI journal article supplement (doi:10.3390/microorganisms11071855), 2023-07-22
Supplement: s1 [file s1]

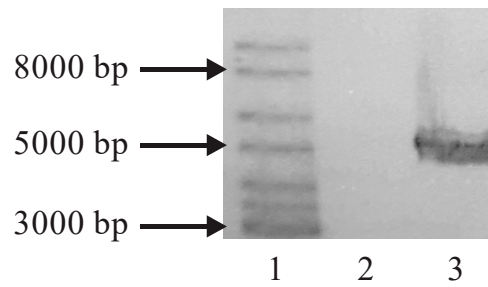

**Figure S1.** Gel electrophoresis representing the 1,3-PDO gene cluster amplification. Lane 1: GeneRuler DNA Ladder Mix (Thermo Fisher Scientific); Lane 2: PCR negative control, whose reaction was performed using water as replacement for DNA template. Lane 3: PCR product, whose reaction was performed using *C. beijerinckii* Br21 genomic DNA as template and dhaB1/2CoTdhaT.fwd and dhaB1/2CoTdhaT.rev as primers.

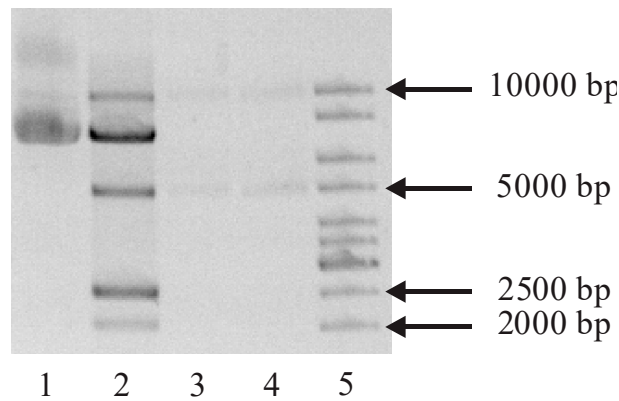

**Figure S2.** Gel electrophoresis. Lane 1: undigested pMTL83251\_P<sub>pta-ack</sub>\_1,3-propanediol\_CLOBI. Lane 2: control digestion of pMTL83251\_P<sub>pta-ack</sub>\_1,3-propanediol\_CLOBI using FastDigest® *Bsp*119I, *Nhe*I e *Xba*I (Thermo Fisher Scientific). Lanes 3 and 4: product of the cloning reaction with pMTL83251\_P<sub>pta-ack</sub> and the 1,3-PDO gene cluster. Lane 5: GeneRuler DNA Ladder Mix (Thermo Fisher Scientific).

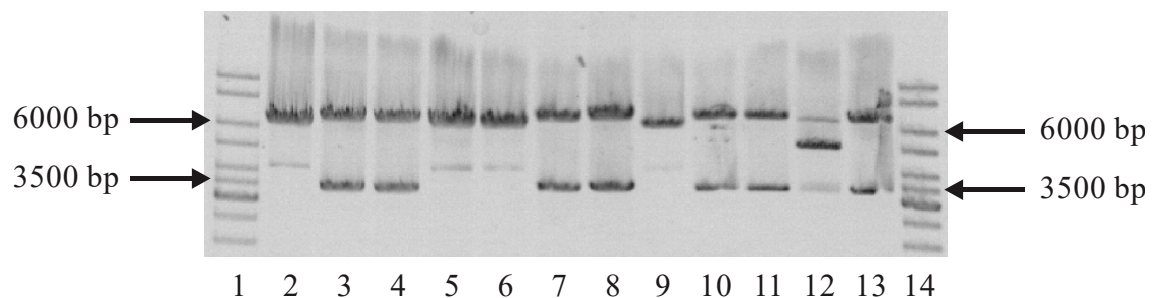

**Figure S3.** Gel electrophoresis of control digestion with *Pvu*II and *Xba*I. Lanes 1 and 14: GeneRuler DNA Ladder Mix (Thermo Fisher Scientific). Lanes 2 to 13: control digestion of plasmid DNA extracted from a culture of 12 different colonies of *E. coli* XL1-Blue MRF', transformed with pMTL83251\_P<sub>pta-ack</sub>\_1,3-PDO\_cluster.

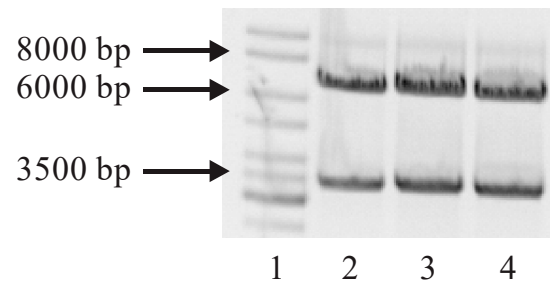

**Figure S4.** Control digestion of pMTL83251\_P<sub>pta-ack</sub>\_1,3-PDO\_cluster, extracted from *C. beijerinckii* Br21, using *Pvu*II and *Xba*I. Lane 1: GeneRuler DNA Ladder Mix (Thermo Fisher Scientific). Lanes 2 to 4: plasmid DNA extracted using cultures derived from 3 different colonies of *C. beijerinckii* Br21 [pMTL83251\_P<sub>pta-ack</sub>\_1,3-PDO\_cluster].
